# Supplementary material for: Aspirin and non-steroidal anti-inflammatory drugs use reduce gastric cancer risk: A dose-response meta-analysis
Source: PubMed Central journal article supplement (PMC5354871; doi:10.18632/oncotarget.13591), 2016-11-25
Supplement: oncotarget-08-4781-s001.pdf [file oncotarget-08-4781-s001.pdf]

# Aspirin and non-steroidal anti-inflammatory drugs use reduce gastric cancer risk: A dose-response meta-analysis

## SUPPLEMENTARY FIGURES AND TABLES

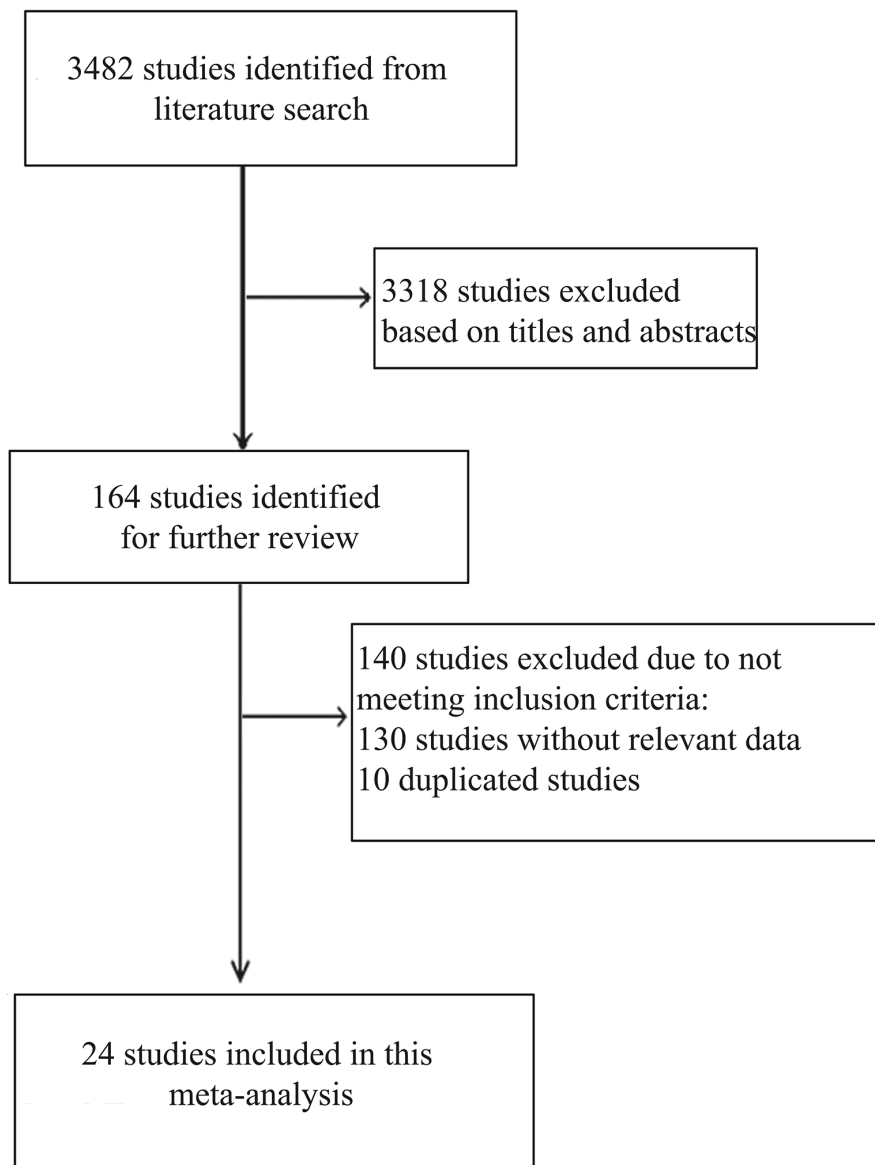

Supplemental Figure S1: Flow diagram showing the study selection process

A

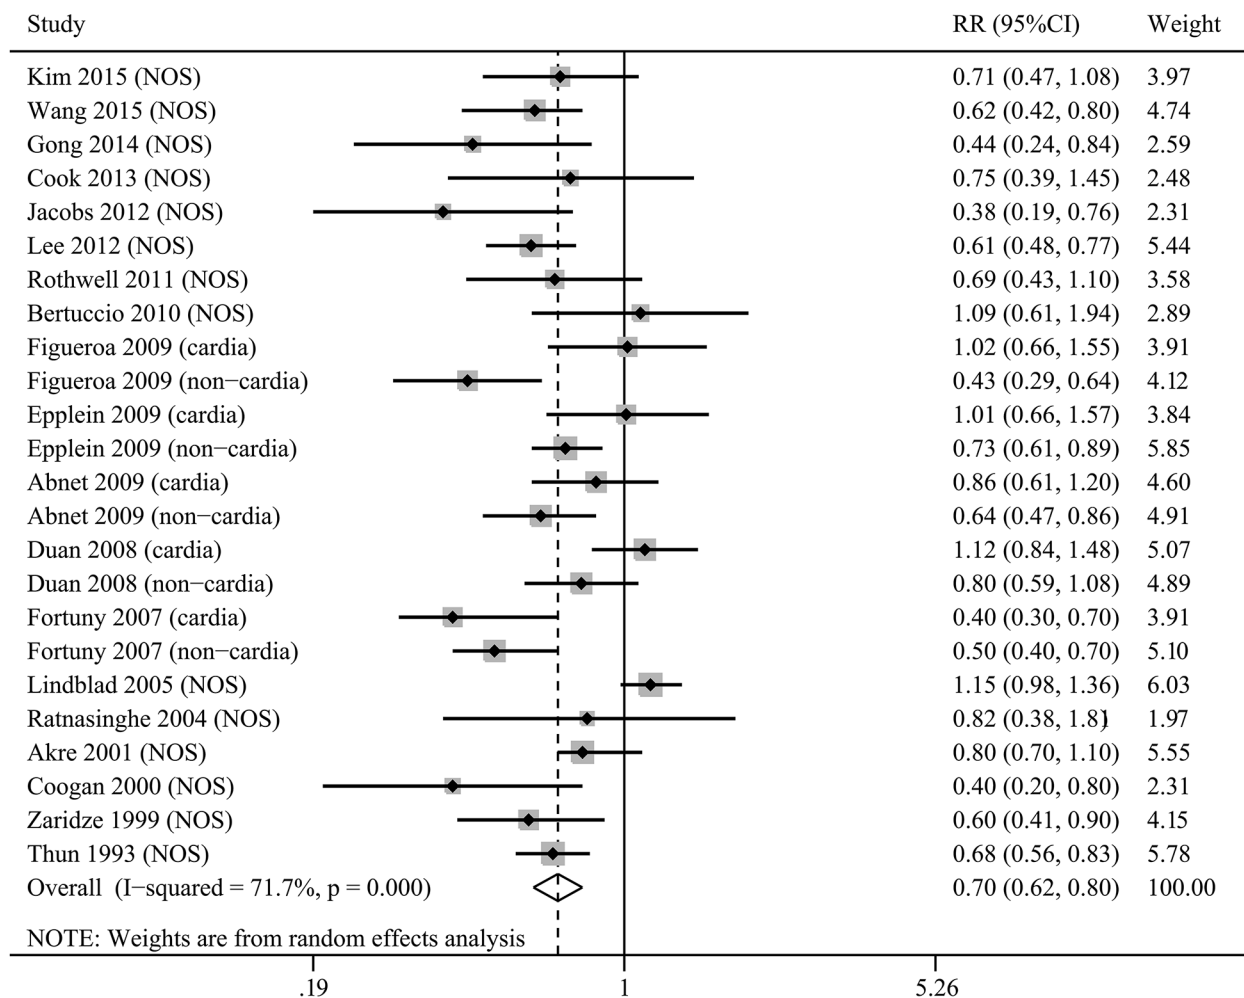

B

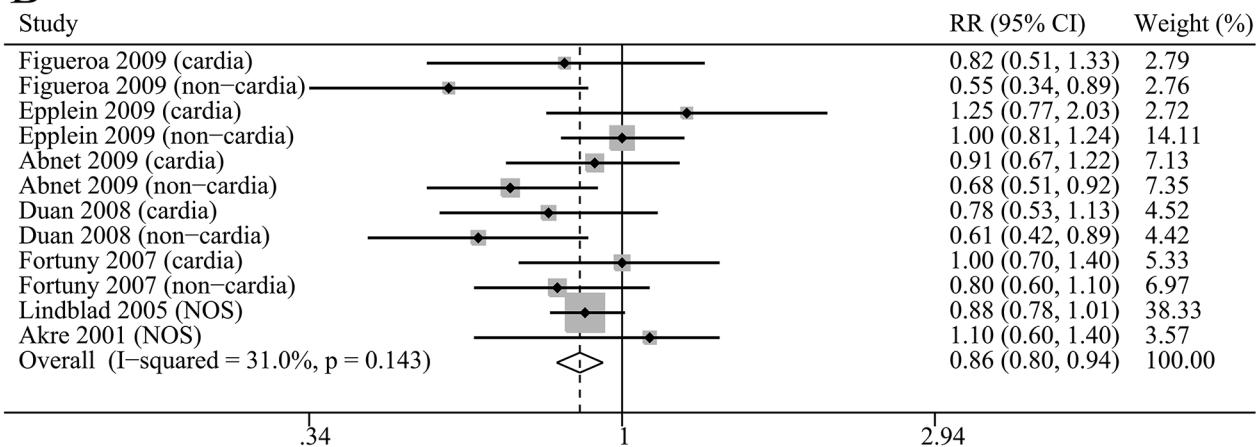

Supplemental Figure S2: The relative risk (RR) was summarized for the relationship between aspirin (A) and non-aspirin NSAIDs use (B) and gastric cancer risk

A

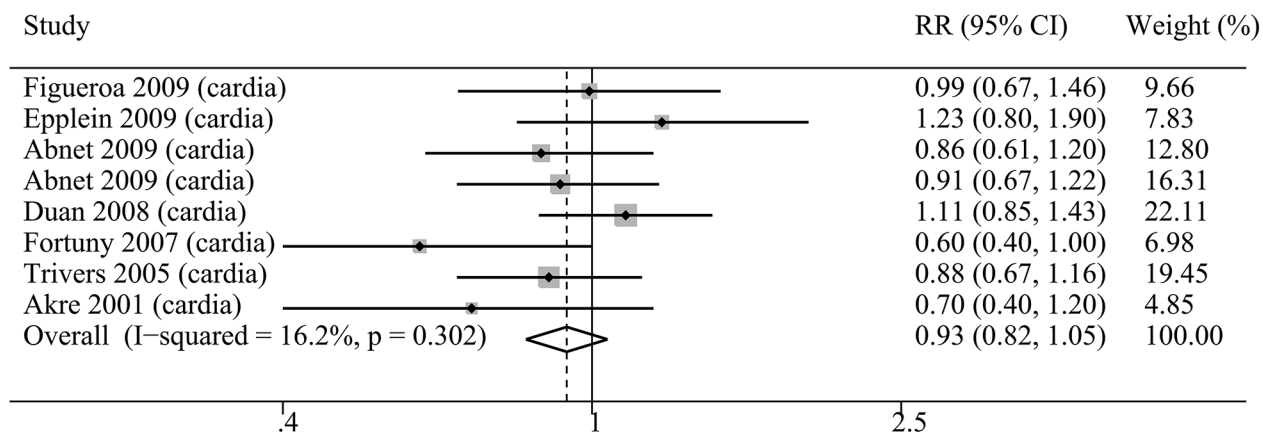

B

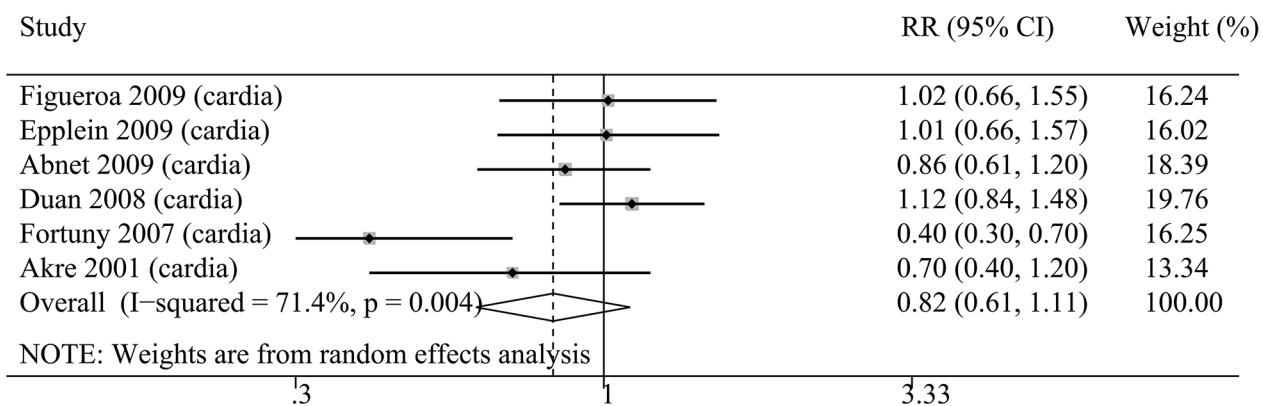

C

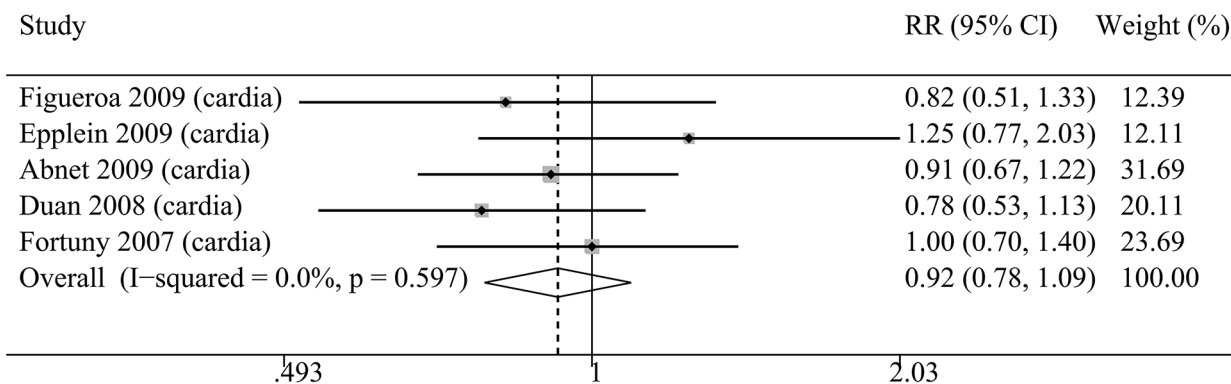

**Supplemental Figure S3: The relative risk (RR) was summarized for the relationship between NSAIDs use and cardia gastric cancer risk. A. Any NSAIDs use and cardia gastric cancer. B. Aspirin use and cardia gastric cancer. C. Non-aspirin NSAIDs use and cardia gastric cancer**

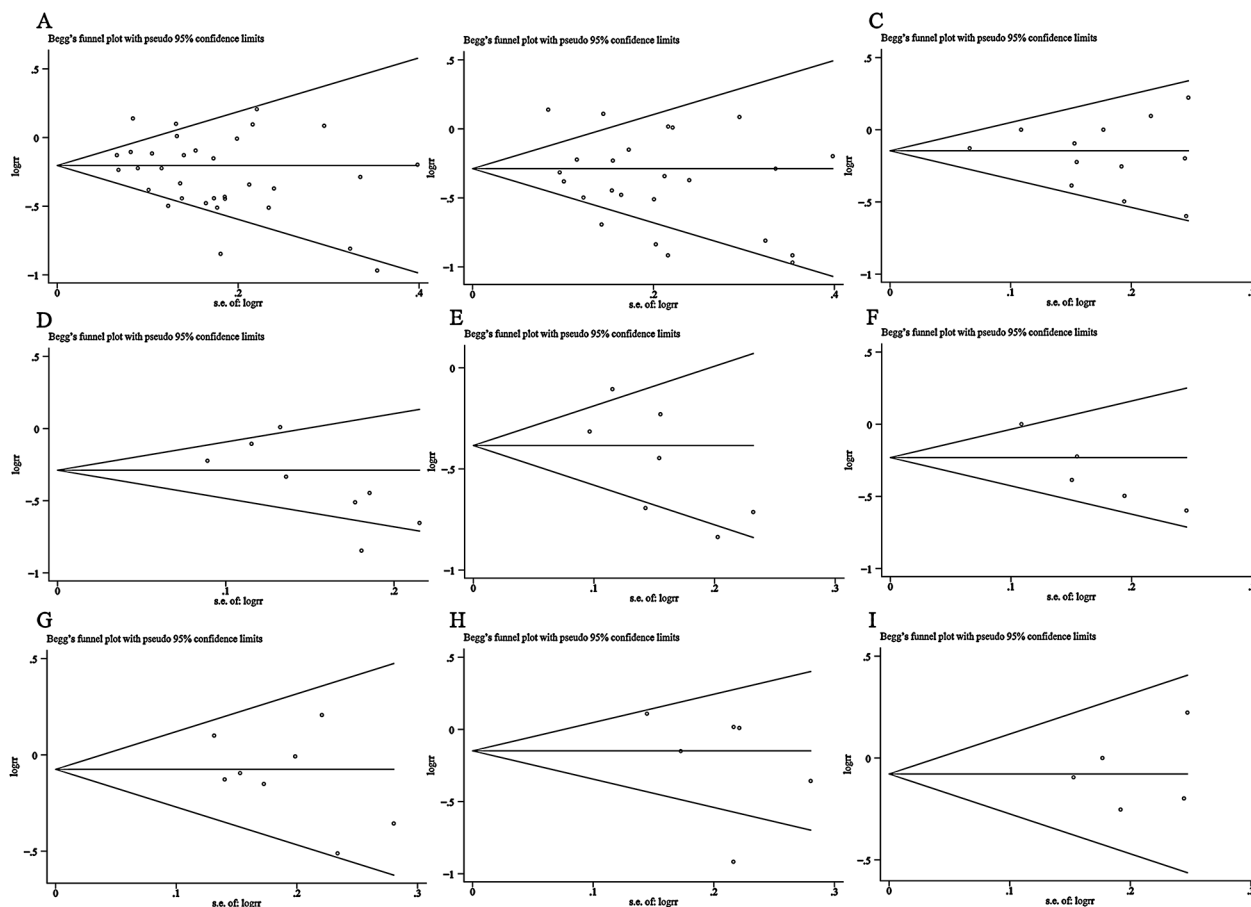

**Supplemental Figure S4: Funnel plot for the publication bias.** A. Any NSAIDs use and gastric cancer. B. Aspirin use and gastric cancer. C. Non-aspirin NSAIDs use and gastric cancer. D. Any NSAIDs use and non-cardia gastric cancer. E. Aspirin use and non-cardia gastric cancer. F. Non-aspirin NSAIDs use and non-cardia gastric cancer. G. Any NSAIDs use and cardia gastric cancer. H. Aspirin use and cardia gastric cancer. I. Non-aspirin NSAIDs use and cardia gastric cancer

**Supplemental File S1: Estimation procedure for dose-response relationship between duration/frequency of NSAIDs use and gastric cancer**

See Supplementary File 1

**Supplemental File S2: Variables of duration of NSAIDs use and gastric cancer**

See Supplementary File 2

**Supplemental File S3: Variables of frequency of NSAIDs use and gastric cancer**

See Supplementary File 3

Supplemental Table S4: The results of publication bias

|                    | P (Begg's Test, continuity corrected) | P (Egger's test) |
|--------------------|---------------------------------------|------------------|
| <b>NSAIDs</b>      |                                       |                  |
| NOS                | 0.25                                  | 0.06             |
| Non-cardia         | 0.06                                  | 0.05             |
| Cardia             | 0.27                                  | 0.27             |
| <b>Aspirin</b>     |                                       |                  |
| NOS                | 0.44                                  | 0.07             |
| Non-cardia         | 0.55                                  | 0.1              |
| Cardia             | 0.45                                  | 0.33             |
| <b>Non-aspirin</b> |                                       |                  |
| NOS                | 0.84                                  | 0.54             |
| Non-cardia         | 0.09                                  | 0.02             |
| Cardia             | 0.81                                  | 0.71             |

Abbreviations, NOS: Not otherwise specified; NSAIDs: Non-steroidal anti-inflammatory drugs.
